# Supplementary material for: Orchestrated control of filaggrin–actin scaffolds underpins cornification
Source: PubMed Central journal article supplement (PMC5854575; doi:10.1038/s41419-018-0407-2), 2018-03-15
Supplement: 41419_2018_407_MOESM2_ESM.pdf [file 41419_2018_407_MOESM2_ESM.pdf]

## II. Supplementary Figures

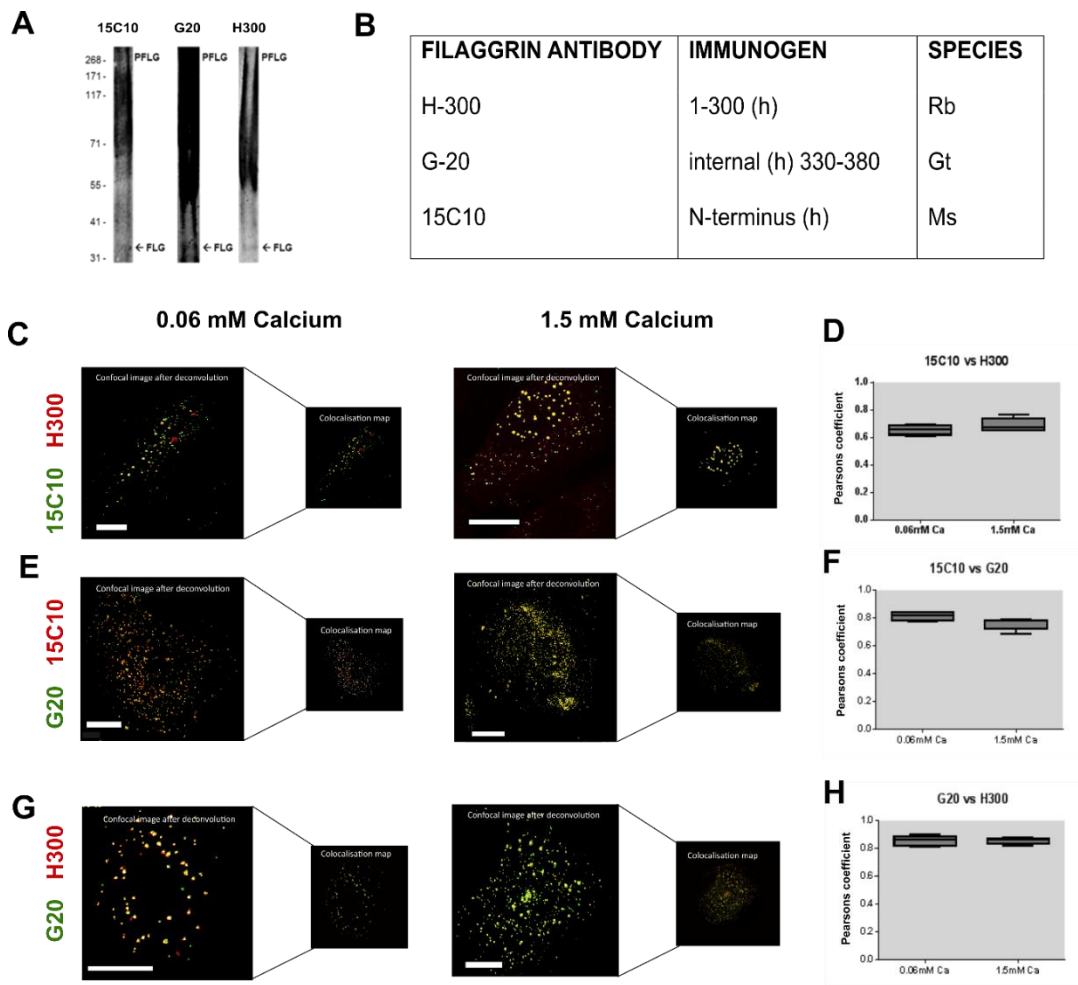

Figure S1.

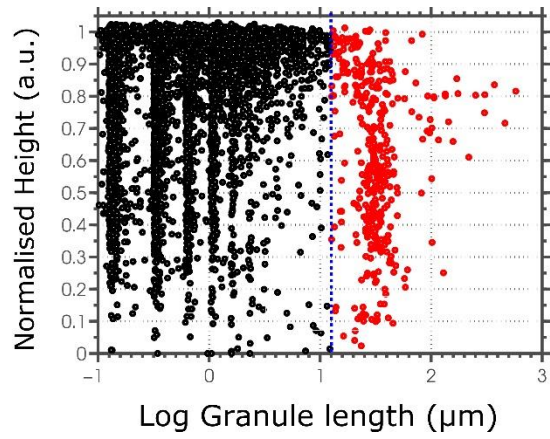

Figure S2.

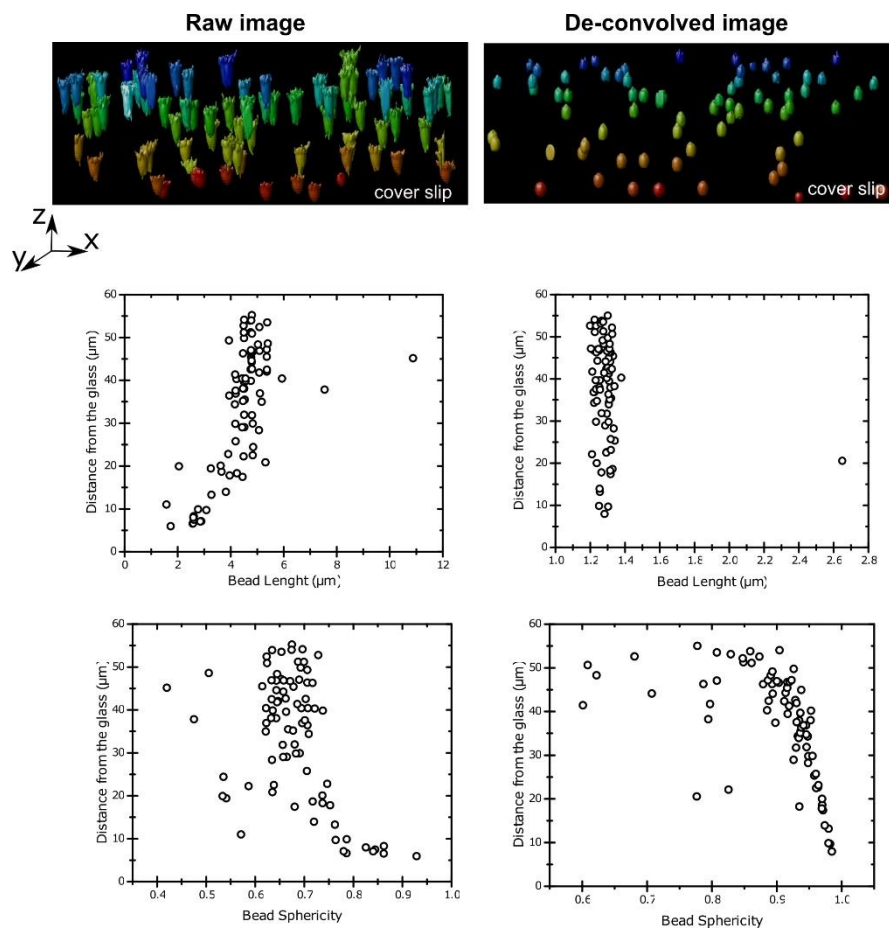

Figure S3.

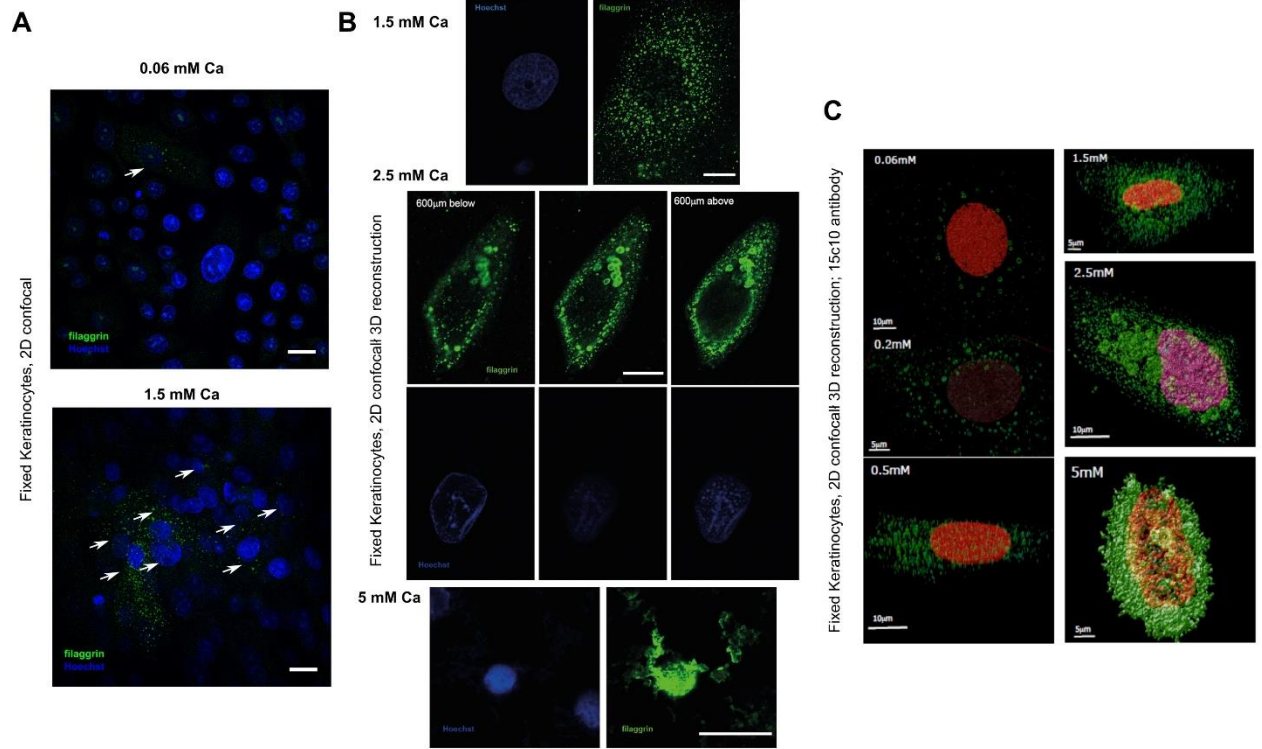

Figure S4.

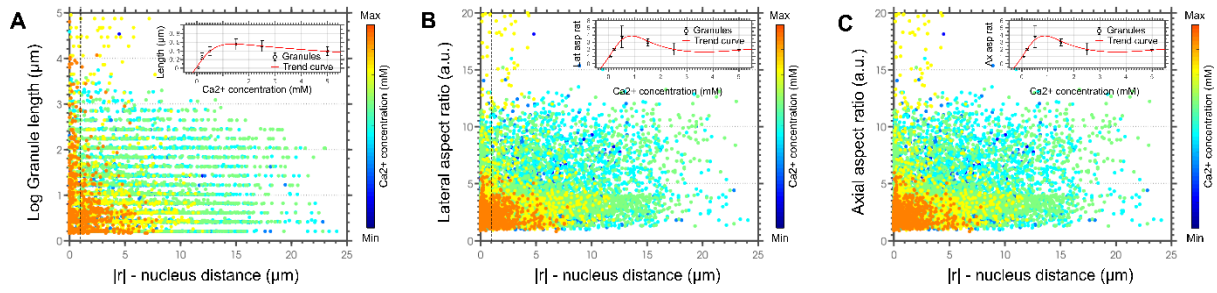

Figure S5.

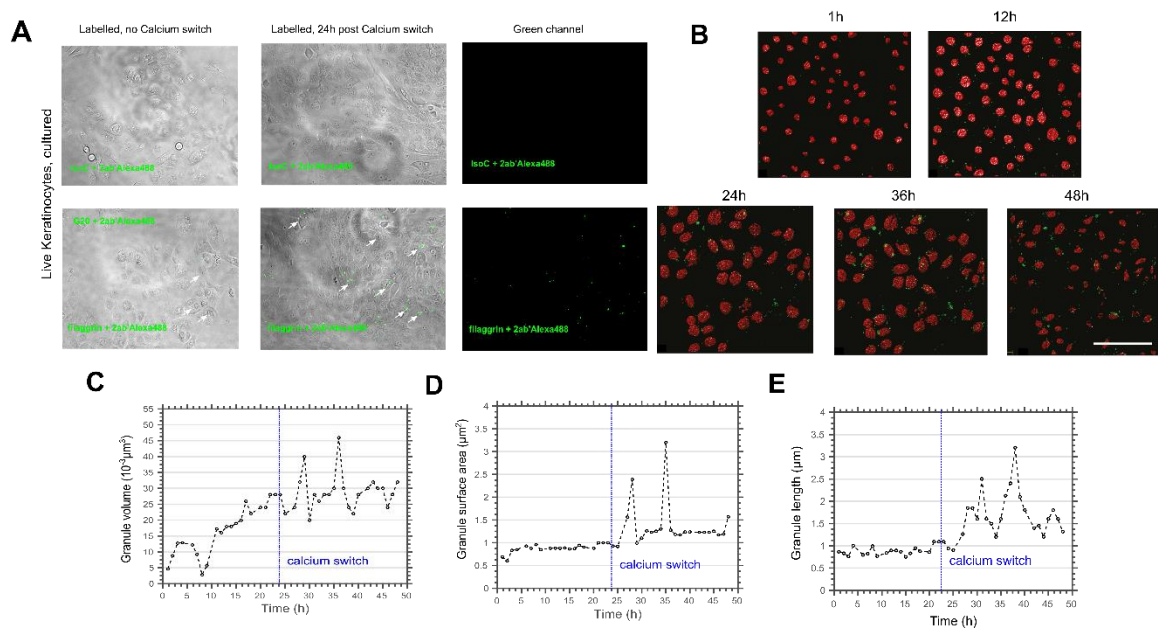

Figure S6.

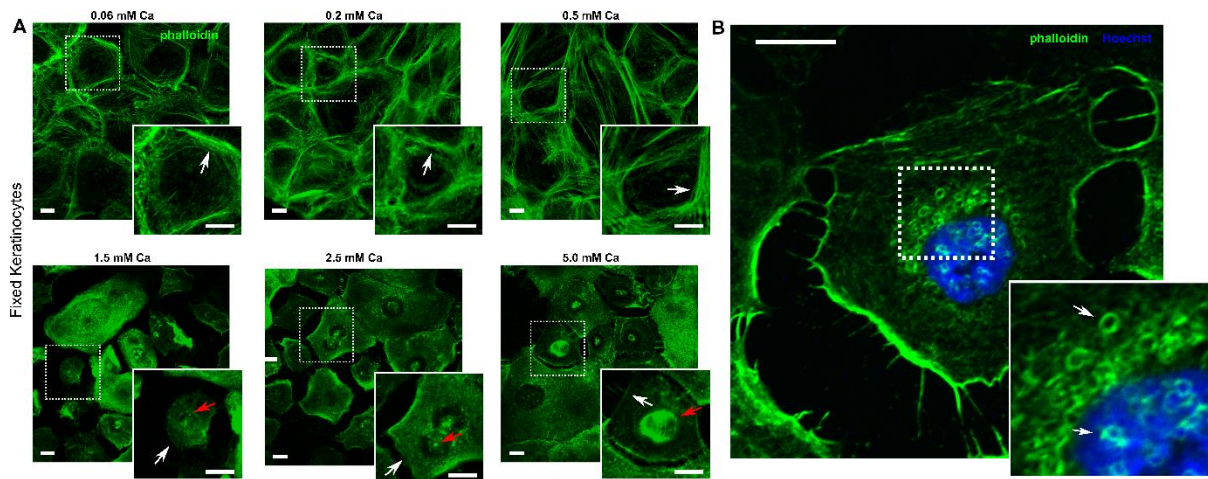

Figure S7.

Figure S8.

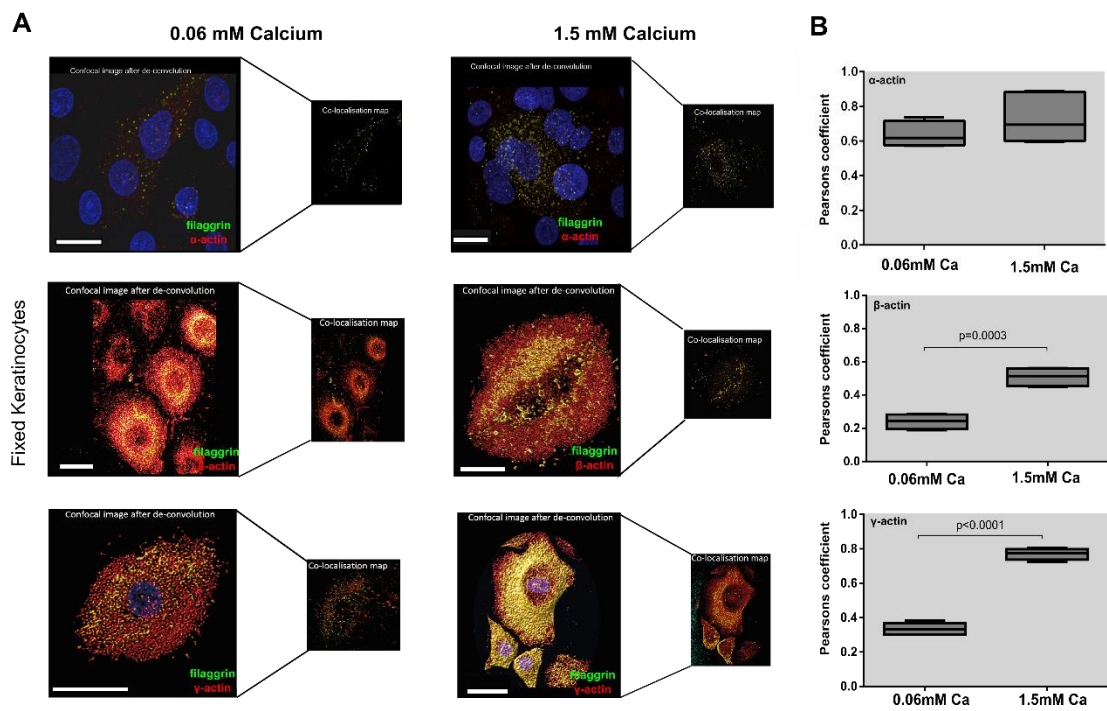

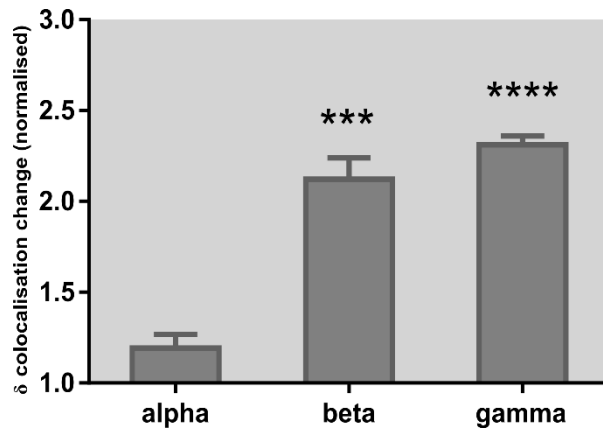

Figure S9.

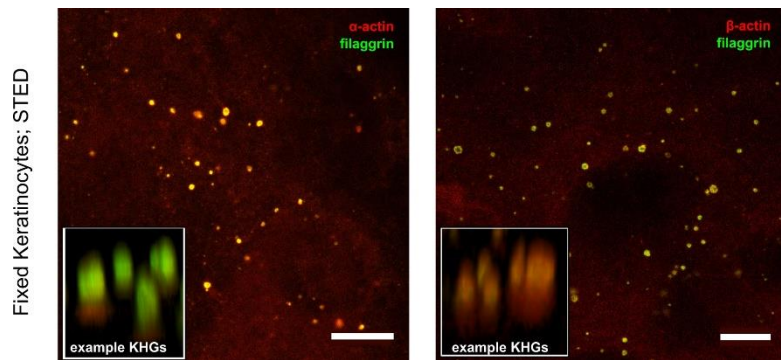

Figure S10.

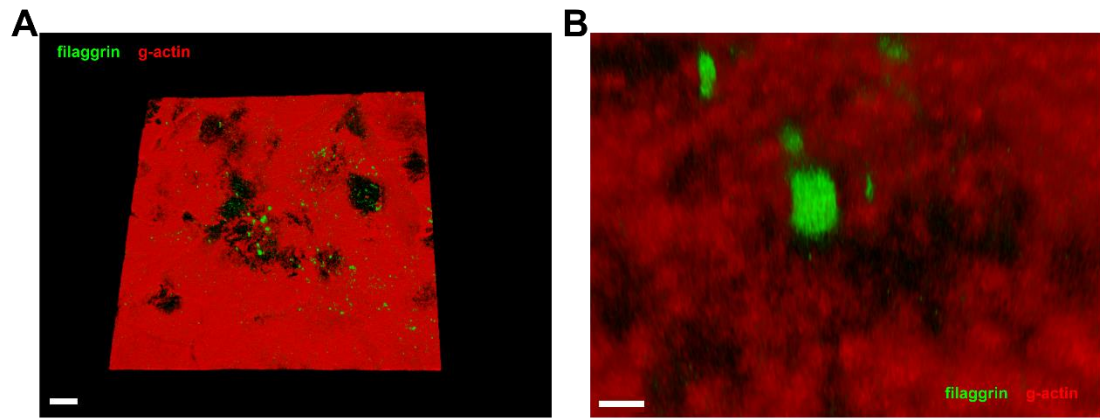

Figure S11.

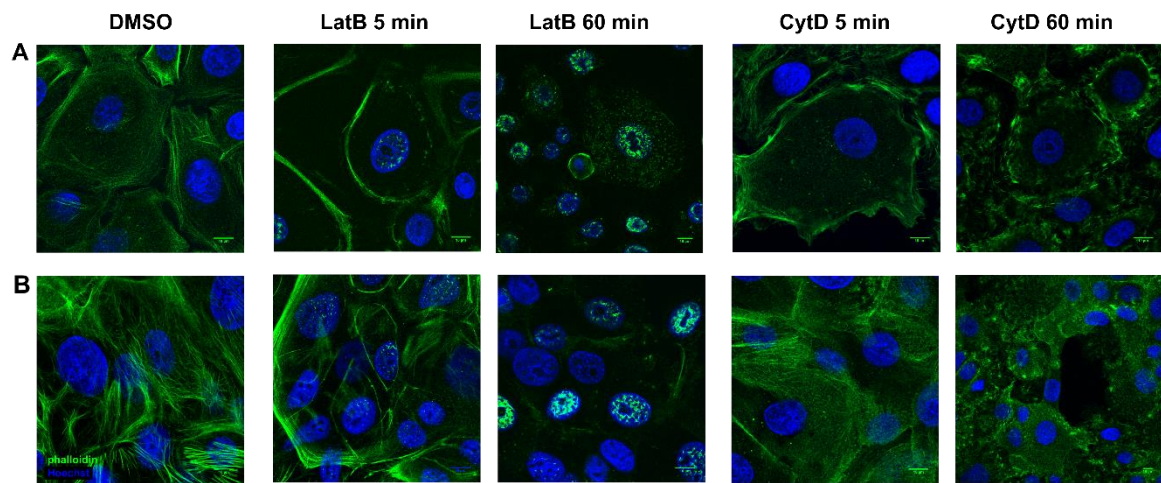

Figure S12.
